# Supplementary material for: Immobilization of imidazolium ionic liquids on hydrotalcites using silane linkers: retardation of memory effect
Source: Royal Society of Chemistry journal article supplement (doi:10.1039/c4ra13839b), 2015-01-01
Supplement: c4ra13839b1.pdf [file c4ra13839b1.pdf]

Supporting Information For:

# Covalent Grafting of Imidazolium Ionic Liquids to Layered Double Hydroxides: Retardation of Memory Effect and Exploration of Surface Chemistry

M. Finn,<sup>a</sup> N. An.<sup>a</sup> and A. Voutchkova-Kostal<sup>a\*</sup>

<sup>a</sup>Department of Chemistry, George Washington University, Washington, DC 20052, USA.

\*Corresponding Author: Adelina Voutchkova-Kostal Email: avoutchkova@gwu.edu

## Table of Contents

|                                                   |       |
|---------------------------------------------------|-------|
| <b>General</b> .....                              | S2    |
| <b>Synthesis and Characterization</b>             |       |
| Hydrotalcite Synthesis.....                       | S2    |
| Ionic Liquid Synthesis.....                       | S3    |
| Attachment of Ionic Liquid to Hydrotalcite.....   | S4    |
| <sup>29</sup> Si CP-MAS NMR for <b>HT-1</b> ..... | S5    |
| FTIR Spectra of <b>HTc-2</b> .....                | S5    |
| Unbound Ionic Liquid NMR Spectra.....             | S6-S7 |
| Unbound Ionic Liquid FTIR Spectra.....            | S8    |
| <b>References</b> .....                           | S8    |

## General

All of the reagents and starting materials were acquired from commercial sources and used as received unless stated otherwise.  $^1\text{H}$  NMR spectra were obtained using a 400 MHz Agilent spectrometer and the chemical shifts are reported in ppm. CP-MAS spectra were collected on a 500 MHz Bruker Advance III spectrometer. FT-IR spectra were obtained using a Perkin Elmer Frontier FT-IR Spectrometer using KBr pellets. PXRD patterns were obtained using a Rigaku MiniFlex II X-Ray diffractometer. Nitrogen isotherms were measured on a Micromeritics TriStar surface analyzer at liquid nitrogen temperatures. Samples were degassed under vacuum at  $110^\circ\text{C}$  for 3 hours prior to measurement. Surface area was calculated using the BET method. Thermogravimetric analysis (TGA) was performed on a Perkin Elmer Pyris 1 TGA. Samples were heated from  $30^\circ\text{C}$ - $650^\circ\text{C}$  at  $20^\circ\text{C}/\text{min}$  in nitrogen. Elemental composition was determined via EDX using a Shimadzu EDX-700 X-Ray spectrometer.

## Synthesis and Characterization

### *Mg:Al Hydrotalcite*

A 300mL solution of  $\text{Mg}(\text{NO}_3)_2 \cdot 6\text{H}_2\text{O}$  (0.5M) and  $\text{Al}(\text{NO}_3)_3 \cdot 9\text{H}_2\text{O}$  (0.16M) was added dropwise over 2 hours to 300 ML of 1.66 M  $\text{Na}_2\text{CO}_3$  solution. The pH was maintained between 9.5 and 10.5 by addition of 0.8 M NaOH. After completing the addition, the solution was heated to  $65^\circ\text{C}$  overnight. The resulting solid was filtered and washed with deionized water until the pH of the filtrate was neutral. The solid was dried at  $110^\circ\text{C}$  overnight, then re-suspended in deionized water, filtered and dried overnight at  $110^\circ\text{C}$  to give a white solid. If calcined hydrotalcite (mixed metal oxide) was desired, the solid was calcined at  $450^\circ\text{C}$  for 24 hours in a furnace. The samples were cooled in a desiccator.

*N*-3-(3-trimethoxysilyl propyl)-3-methyl imidazolium chloride (**1**)

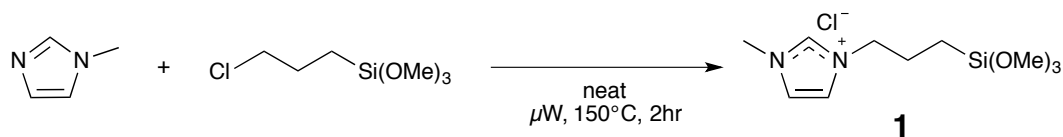

An oven-dried 10-mL microwave vial was charged with 1-methylimidazole (1.1316 g, 13.78 mmol) and (3-chloropropyl)trimethoxy silane (2.7396 g, 13.78 mmol) and heated in a CEM Discover microwave to 150°C for 2 hours. The resulting viscous yellow syrup was found to be analytically pure and used without further purification. The spectral data below agrees with previously reported characterizations.<sup>1</sup>

Yield: <99%. <sup>1</sup>H NMR (400 MHz, CDCl<sub>3</sub>, 25 °C)  $\delta$ : 0.57 (t, 2H), 1.97 (m, 2H), 3.52 (s, 9H), 4.08 (s, 3H), 4.28 (t, 2H), 7.31 (m, 1H), 7.47 (m, 1H), 10.67 (s, 1H). <sup>13</sup>C NMR (400 MHz, CDCl<sub>3</sub>, 25°C):  $\delta$ 5.93, 24.10, 36.56, 50.66, 51.73, 121.65, 123.24, 138.40.

*N*-3-(3-trimethoxysilyl propyl)-3-methyl imidazolium hexafluorophosphate (**2**)

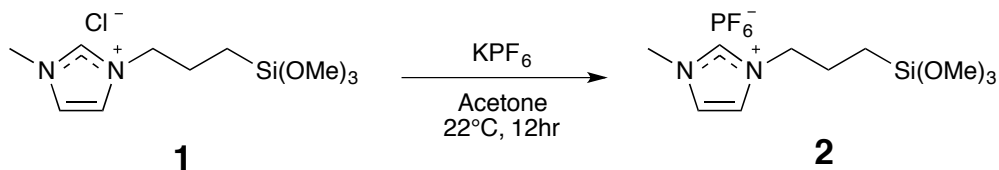

*N*-3-(3-trimethoxysilyl propyl)-3-methyl imidazolium chloride (**IL-1**, 5 mmol, 1.404g) was added to an oven-dried round bottom flask, placed under a nitrogen atmosphere and diluted with dry acetone (25mL). Another round bottom flask was charged with potassium hexafluorophosphate (5 mmol, 0.920g), placed in a nitrogen atmosphere and diluted with dry acetone (20mL). The solution of KPF<sub>6</sub> was transferred to the flask with **IL-1** and stirred at room temperature for 12 hr. The resulting white precipitate was filtered and the filtrate was dried *in vacuo* to yield a

viscous orange liquid which was analytically pure. The spectral data below agrees with previously reported values.<sup>2</sup>

Yield: 95%. <sup>1</sup>H NMR (400 MHz, CDCl<sub>3</sub>, 25°C): δ 0.57 (t, 2H), 1.95 (m, 2H), 3.51 (s, 9H), 4.07 (s, 3H), 4.27 (t, 2H), 7.34 (m, 1H), 7.56 (m, 1H), 10.53 (s, 1H). <sup>13</sup>C NMR (400 MHz, CDCl<sub>3</sub>, 25°C): δ 5.92, 24.12, 36.53, 50.67, 51.69, 121.75, 123.49, 138.05.

### *Immobilization of 2 to Hydrotalcite*

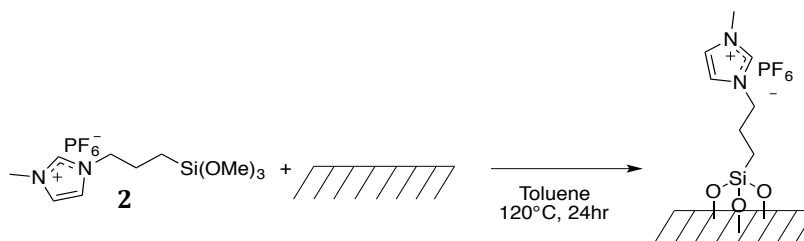

In a dry round bottom flask hydrotalcite (0.400g) was added to a solution of **IL-2** (0.300g) in 100 mL dry toluene and refluxed for 24 hours. After cooling to room temperature the solid was filtered and then washed in a Soxhlet extractor (refluxing dichloromethane) for 24 hours. The washed solid was then dried in a vacuum oven at 80° C for 12 hr..

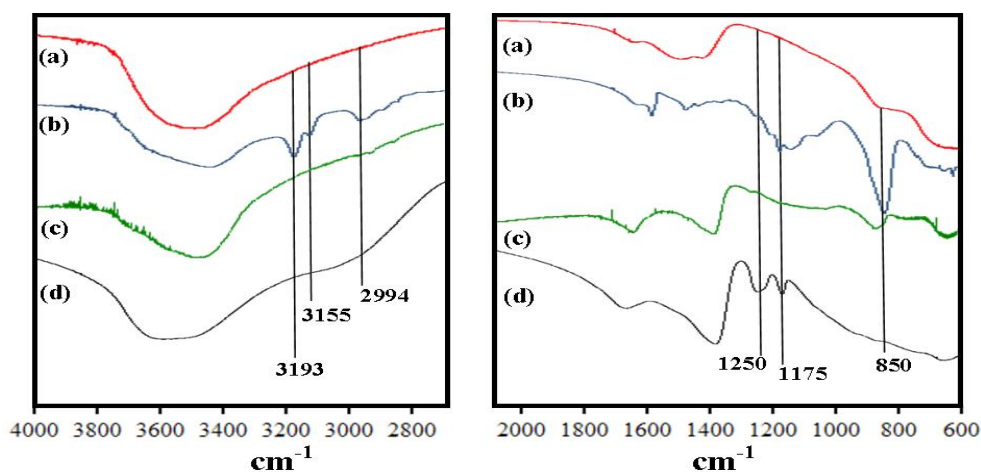

**Figure S1.** FTIR Spectra of (a) HTc (b) *HTc-2* (c) *HTc-2* hydrolysis test (d) HTc hydrolysis test.

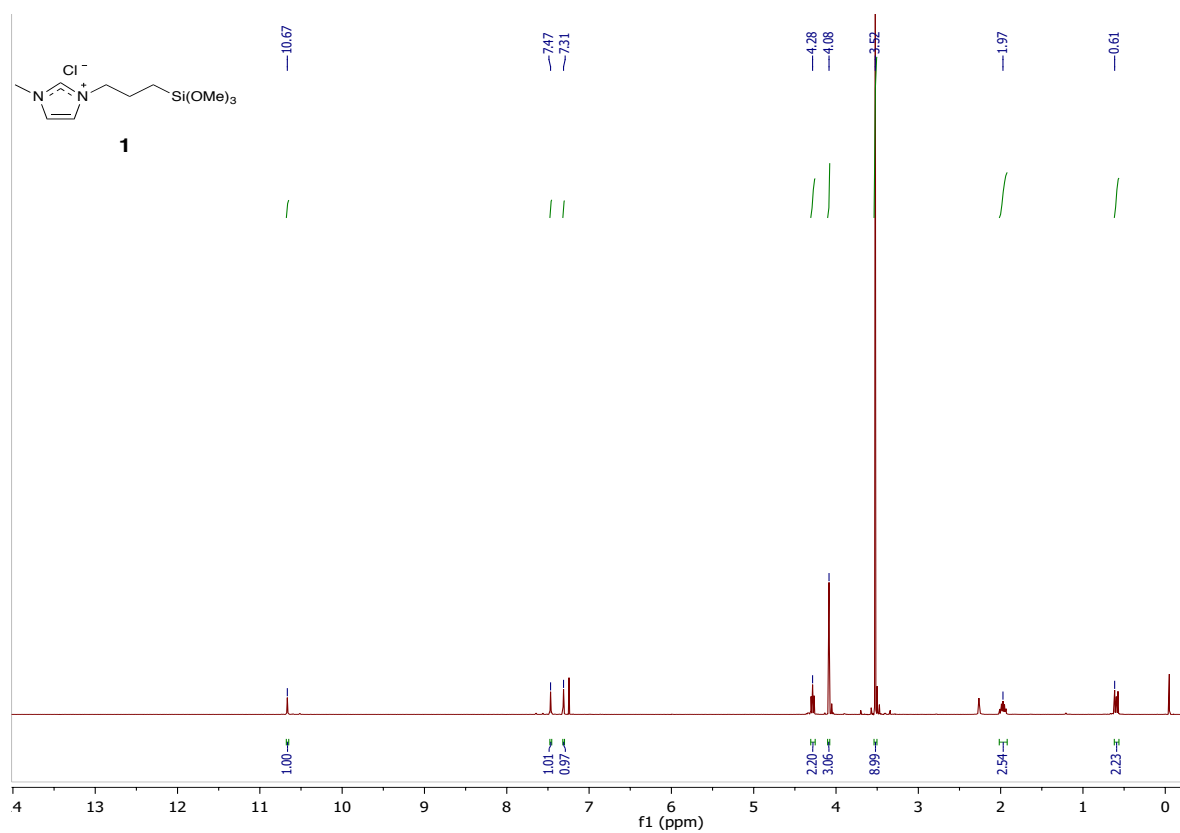

**Figure S2.**  $^1\text{H}$  NMR of **1**.

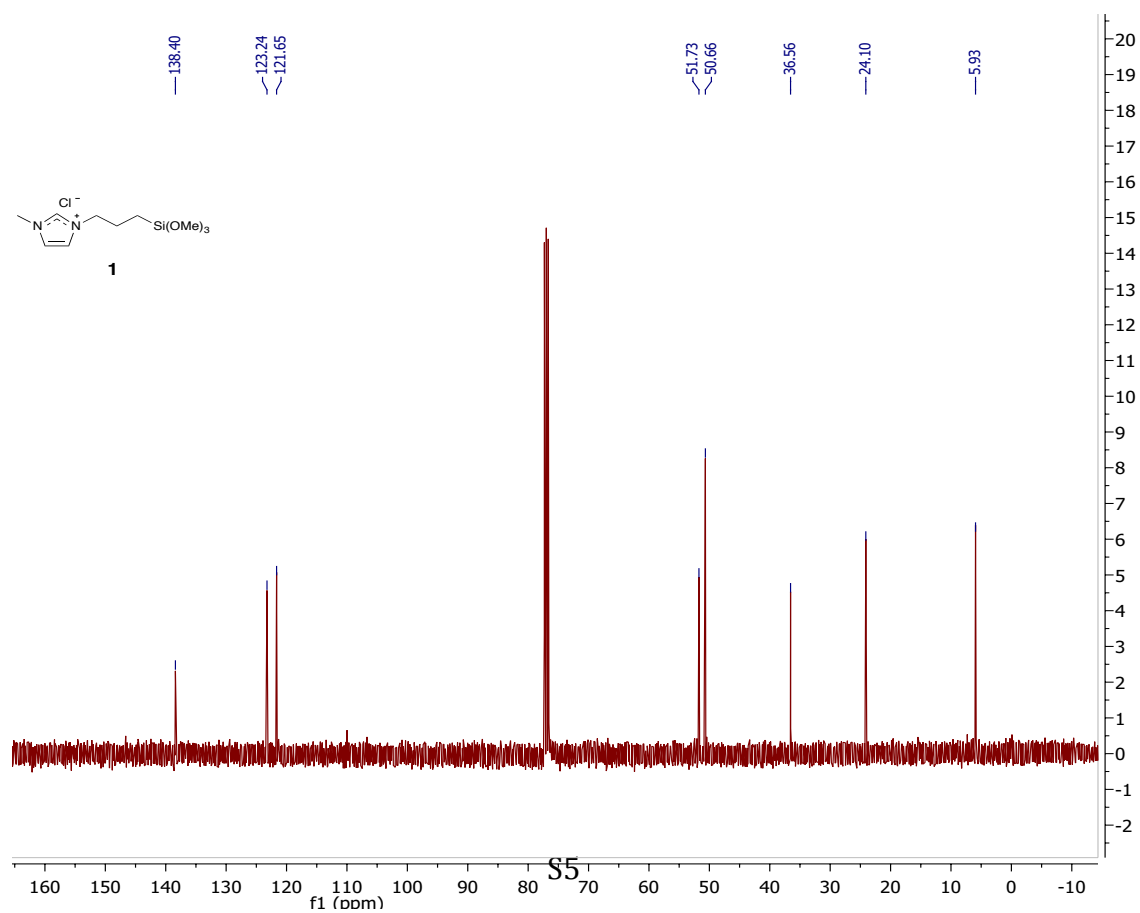

**Figure S3.**  $^{13}\text{C}$  NMR of **1**

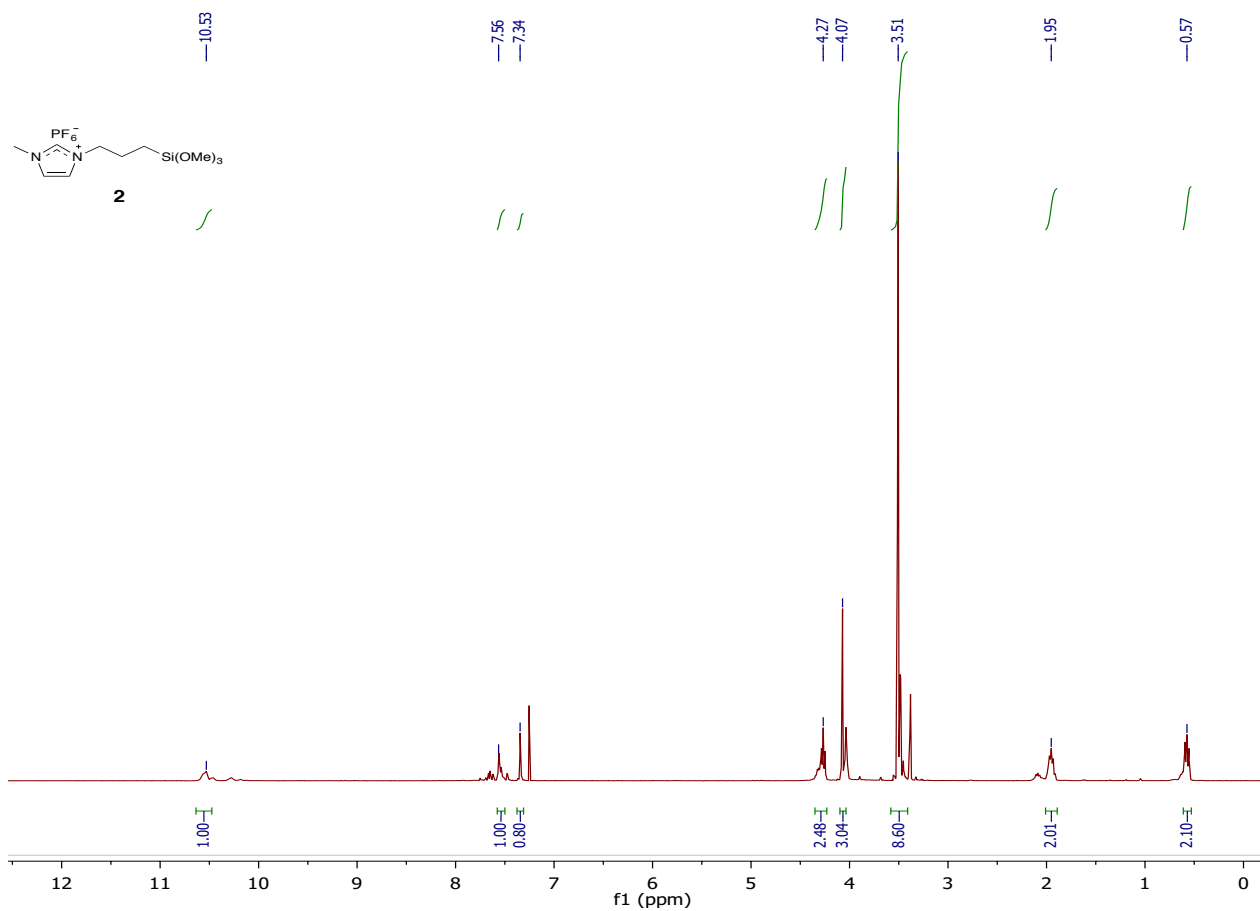

Figure S4.  $^1\text{H}$  NMR of 2

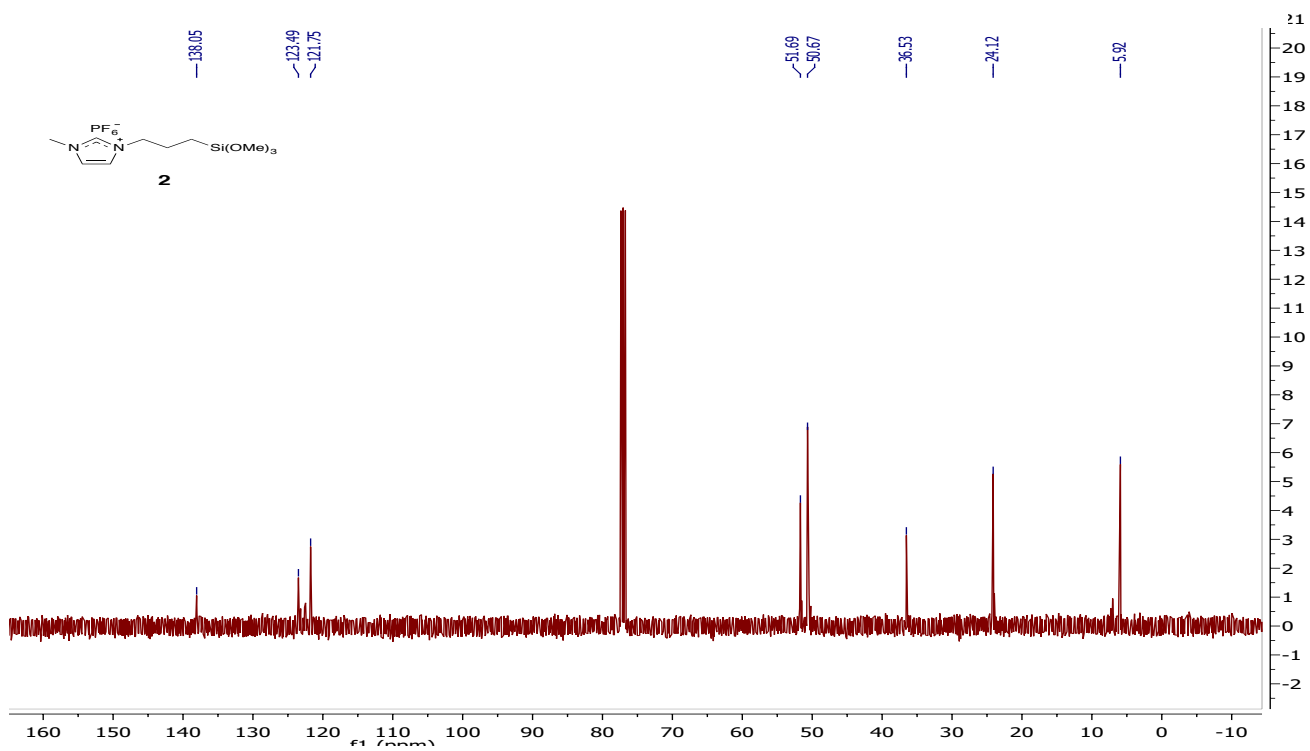

Figure S5.  $^{13}\text{C}$  NMR of 2

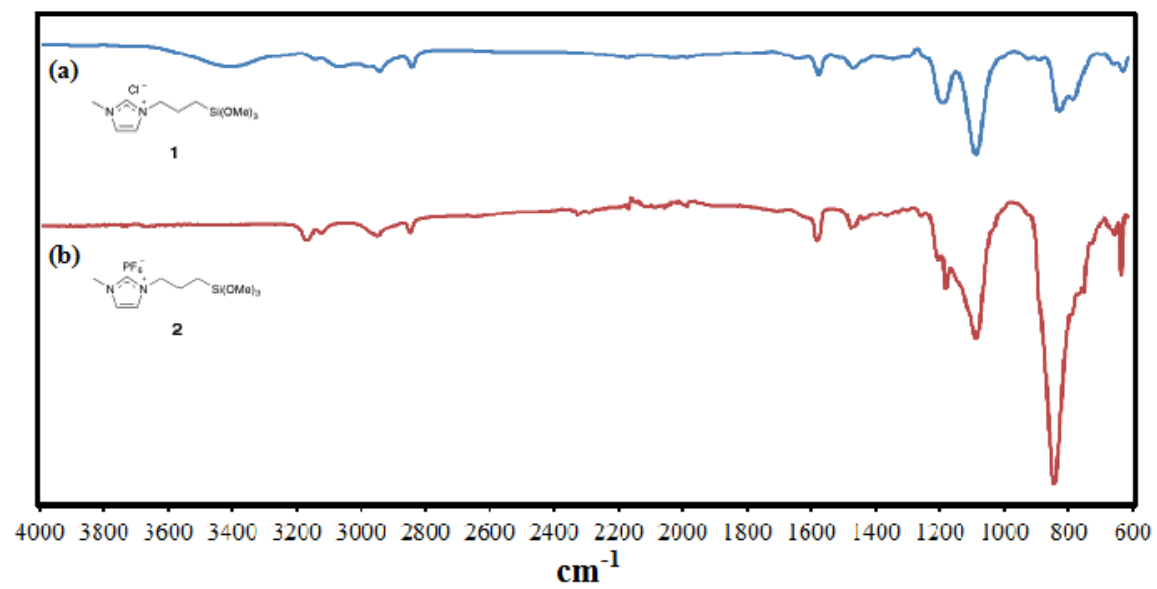

**Figure S6.** FTIR spectra of unsupported **1** (a) and **2** (b)

### References

1. D. E. Babak Karimi, *Organic Letters*, 2006, 8, 1237-1240.
2. M. Bagherzadeh and S. Ghazali-Esfahani, *Tetrahedron Letters*, 2013, 54, 3765-3768.
